# Supplementary material for: Hierarchical porous-structured self-standing carbon nanotube electrode for high-power lithium–oxygen batteries
Source: Royal Society of Chemistry journal article supplement (doi:10.1039/d3ma00237c), 2023-01-01
Supplement: d3ma00237c1.pdf [file d3ma00237c1.pdf]

## **Hierarchical porous-structured self-standing carbon nanotube electrode for high-power lithium–oxygen batteries**

*Jittraporn Saengkaew<sup>1</sup>, Takashi Kameda<sup>1,2</sup> and Shoichi Matsuda<sup>1,2\*</sup>*

<sup>1</sup>Center for Green Research on Energy and Environmental Materials, National Institute for Material Science, 1-1 Namiki, Tsukuba, Ibaraki 305-0044, Japan

<sup>2</sup>NIMS-SoftBank Advanced Technologies Development Center, National Institute for Material Science, 1-1 Namiki, Tsukuba, Ibaraki 305-0044, Japan

\*Correspondence: [MATSUDA.Shoichi@nims.go.jp](mailto:MATSUDA.Shoichi@nims.go.jp)

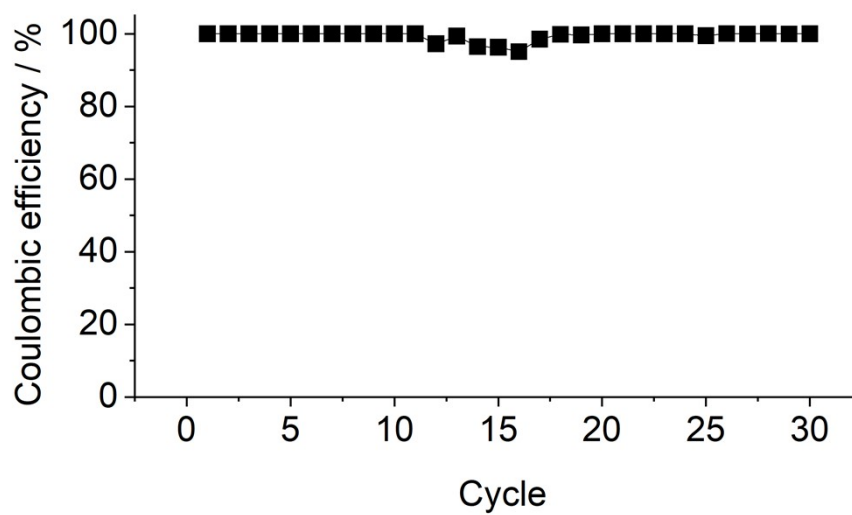

**Fig. S1** Plot of coulombic efficiency versus cycle number in NIPS-CNT LOB cells operated at current densities of 2.0 and 0.2 mA cm<sup>-2</sup> during the discharging and charging processes, respectively.

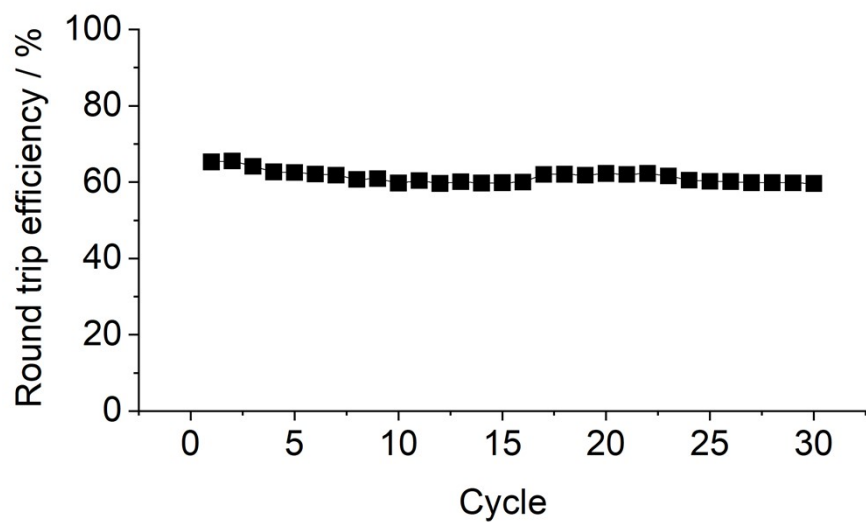

**Fig. S2** Plot of round trip efficiency versus cycle number in NIPS-CNT LOB cells operated at current densities of 2.0 and 0.2 mA cm<sup>-2</sup> during the discharging and charging processes, respectively.

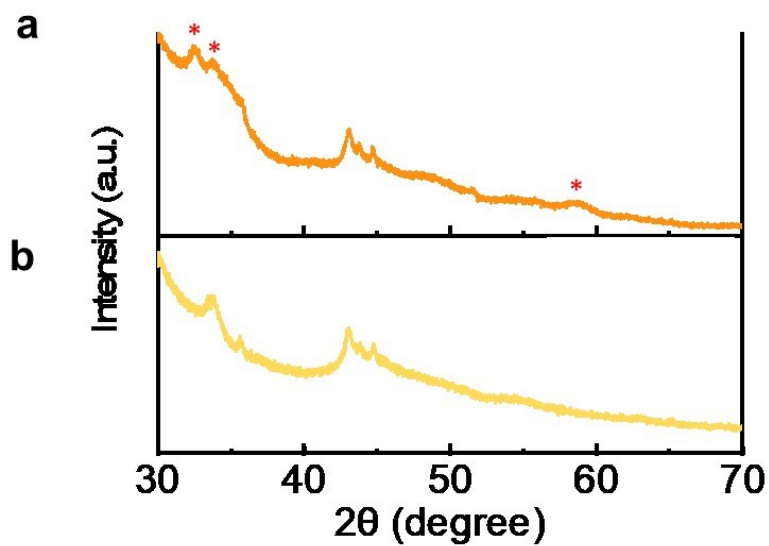

**Fig. S3** XRD profile of NIPS-CNT electrodes taken out from LOB cell after (a) 1<sup>st</sup> discharge and (b) 1<sup>st</sup> charge process. The current density during discharge and charge process was set to 2.0 and 0.2 mA cm<sup>-2</sup>. Peaks assignable to Li<sub>2</sub>O<sub>2</sub> are shown as asterisk.

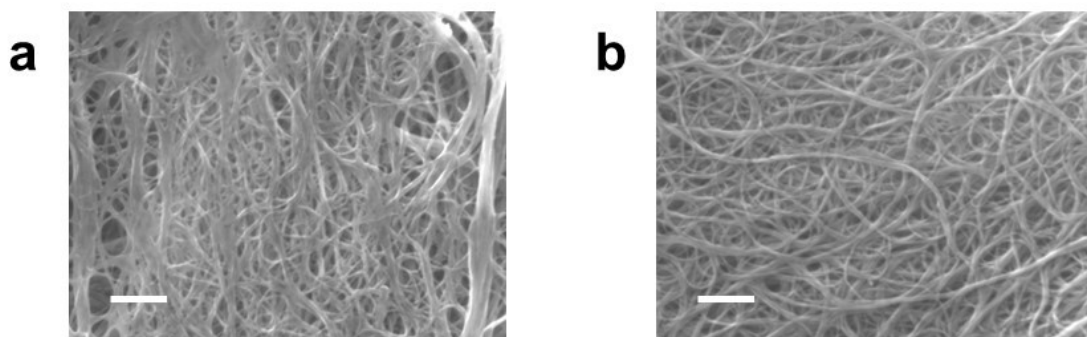

**Fig. S4** SEM images of NIPS-CNT electrodes taken out from LOB cell after (a) 1<sup>st</sup> discharge or (b) 1<sup>st</sup> charge process. The current density during discharge and charge process was set to 2.0 and 0.2 mA cm<sup>-2</sup>. Scale bars are 500 nm.

**Table S1.** Summary of LOB performance reported in the literatures in the region of E/C lower than 25 g A<sup>-1</sup> h<sup>-1</sup>

|          | Carbon                 | Electrolyte            | Capacity                 | Current density        | Discharge voltage | Power density          | E/C   | Cycle life | Ref.      |
|----------|------------------------|------------------------|--------------------------|------------------------|-------------------|------------------------|-------|------------|-----------|
| Material | (mg cm <sup>-2</sup> ) | (mg cm <sup>-2</sup> ) | (mA h cm <sup>-2</sup> ) | (mA cm <sup>-2</sup> ) | (V)               | (mW cm <sup>-2</sup> ) |       |            |           |
| CNT      | 3.6                    | 17.6                   | 2                        | 2                      | 2.3               | 4.60                   | 8.80  | 30         | This work |
| KB       | 1.00                   | 8.30                   | 3.00                     | 0.30                   | 2.69              | 0.81                   | 2.77  | 6          | 3         |
| KB       | 5.40                   | 28.20                  | 4.00                     | 0.40                   | 2.72              | 1.09                   | 7.05  | 37         | 3         |
| Super P  | 30.00                  | 40.82                  | 13.45                    | 0.50                   | 2.75              | 1.38                   | 3.03  | 2          | 15        |
| Super P  | 30.00                  | 40.82                  | 9.74                     | 0.50                   | 2.75              | 1.38                   | 4.19  | 3          | 15        |
| Super P  | 30.00                  | 40.82                  | 6.70                     | 0.50                   | 2.75              | 1.38                   | 6.09  | 4          | 15        |
| Super P  | 30.00                  | 40.82                  | 3.38                     | 0.50                   | 2.75              | 1.38                   | 12.08 | 8          | 15        |
| CNT      | 0.20                   | 59.80                  | 12.60                    | 0.50                   | 2.50              | 1.25                   | 4.75  | 11         | 16        |
| CNT      | 0.20                   | 59.80                  | 1.20                     | 0.50                   | 2.50              | 1.25                   | 49.83 | 170        | 16        |
| CNT      | 7.50                   | 87.50                  | 10.00                    | 1.50                   | 2.50              | 3.75                   | 8.75  | 7          | 17        |
| CNT      | 7.50                   | 87.50                  | 4.50                     | 1.50                   | 2.50              | 3.75                   | 19.44 | 40         | 17        |
| CNT      | 7.50                   | 87.50                  | 3.00                     | 1.50                   | 2.50              | 3.75                   | 29.17 | 45         | 17        |
| CNT      | 7.50                   | 87.50                  | 1.50                     | 1.50                   | 2.50              | 3.75                   | 58.33 | 315        | 17        |
